# Supplementary material for: Towards a ‘patient-centred’ operationalisation of the new dynamic concept of health: a mixed methods study
Source: HighWire-hosted journal article supplement (doi:10.1136/bmjopen-2015-010091), 2016-01-01
Supplement: bmjopen-2015-010091supp3.pdf [file bmjopen-2015-010091supp3.pdf]

SUPPLEMENTARY FILE 3

Mean composite scores for healthcare providers compared to patients

|                                 | Patients<br>(N=575) | Physicians (N= 317) |                     |                     | Nurses (N=110) |                    |                    | Physiotherapists (N=216) |                     |                    |
|---------------------------------|---------------------|---------------------|---------------------|---------------------|----------------|--------------------|--------------------|--------------------------|---------------------|--------------------|
|                                 |                     | Mean±SD*            | Mean±SD*            | p**                 | p adjusted***  | Mean±SD*           | p**                | p adjusted***            | Mean±SD*            | p**                |
| Bodily Functions                | 7.37 ±1.13          | 7.25±0.98           | 0.015 <sup>§</sup>  | 0.065               | 7.54±0.87      | 0.277              | 0.915              | 7.28±0.97                | 0.049 <sup>§</sup>  | 0.220              |
| Mental functions & perception   | 7.56 ±1.22          | 7.18±1.28           | <0.001 <sup>§</sup> | 0.022 <sup>§</sup>  | 7.78±0.88      | 0.364              | 0.009 <sup>§</sup> | 7.39±1.06                | 0.003 <sup>§</sup>  | 0.810              |
| Spiritual/existential dimension | 7.28 ±1.37          | 6.57±1.58           | <0.001 <sup>§</sup> | 0.002 <sup>§</sup>  | 7.42±1.10      | 0.790              | 0.025 <sup>§</sup> | 6.99±1.22                | <0.001 <sup>§</sup> | 0.397              |
| Quality of Life                 | 7.74 ±1.08          | 7.33±1.16           | <0.001 <sup>§</sup> | 0.005 <sup>§</sup>  | 7.89±0.84      | 0.519              | 0.115              | 7.67±0.86                | 0.040 <sup>§</sup>  | 0.511              |
| Social & societal participation | 7.27 ±1.45          | 6.61±1.53           | <0.001 <sup>§</sup> | 0.002 <sup>§</sup>  | 7.48±1.07      | 0.439              | 0.006 <sup>§</sup> | 7.10±1.08                | <0.001 <sup>§</sup> | 0.171              |
| Daily functioning               | 7.49 ±1.37          | 6.81±1.43           | <0.001 <sup>§</sup> | <0.001 <sup>§</sup> | 7.03±1.55      | 0.002 <sup>§</sup> | 0.120              | 6.89±1.48                | <0.001 <sup>§</sup> | 0.019 <sup>§</sup> |

\* SD= Standard Deviation

\*\* p-value for difference in mean score between patient and specific healthcare provider, as determined by Mann-Whitney

\*\*\* p-value for difference in mean score between patient and specific healthcare provider, adjusted for age, gender, chronic disease, as determined by GLM

§ Significant (p ≤ 0,05)
